# Supplementary material for: Overall Survival Signature of 5-Methylcytosine Regulators Related Long Non-Coding RNA in Hepatocellular Carcinoma
Source: Front Oncol. 2022 May 24;12:884377. doi: 10.3389/fonc.2022.884377 (PMC9172585; doi:10.3389/fonc.2022.884377)
Supplement: Supplementary file 2 [file Table_2.xlsx]

## Sheet: Sheet1
POU2AF1	IgG
IGLC2	IgG
IGHM	IgG
IGH@	IgG
IGHG1	IgG
IGKC	IgG
IGLJ3	IgG
LOC91316	IgG
LOC440871	IgG
IGL@	IgG
IGHD	IgG
IGLL1	IgG
IGKV1D‐13	IgG
IGL	IgG
LOC391427	IgG
LOC339562	IgG
IFI30	HCK
LAPTM5	HCK
ITGB2	HCK
C1QB	HCK
SLCO2B1	HCK
CD163	HCK
TYROBP	HCK
FCER1G	HCK
SLC7A7	HCK
CCR1	HCK
TFEC	HCK
HCK	HCK
NCF2	HCK
LAIR1	HCK
CD86	HCK
C1QA	HCK
MS4A4A	HCK
MNDA	HCK
AIF1	HCK
LST1	HCK
DOCK2	HCK
RNASE6	HCK
MS4A6A	HCK
HLA‐DPB1	MHC‐II
PRG1	MHC‐II
CTSS	MHC‐II
HLA‐DMB	MHC‐II
HLA‐DRB1	MHC‐II
LCP2	MHC‐II
PTPRC	MHC‐II
HLA‐DRA	MHC‐II
CD74	MHC‐II
HLA‐DPA1	MHC‐II
HLA‐DQA1	MHC‐II
HLA‐DMA	MHC‐II
CCL5	LCK
IL2RG	LCK
CD48	LCK
SELL	LCK
SCYA5	LCK
LCK	LCK
GZMA	LCK
IL7R	LCK
KLRK1	LCK
CD2	LCK
STAT4	LCK
TNFRSF7	LCK
SLAMF1	LCK
CCR7	LCK
GZMK	LCK
CCR2	LCK
LTB	LCK
TRA@	LCK
PRKCB1	LCK
CD3Z	LCK
SH2D1A	LCK
TRBC1	LCK
ITK	LCK
CD3D	LCK
GIMAP5	LCK
PLAC8	LCK
GIMAP4	LCK
HCLS1	LCK
INPP5D	LCK
CD53	LCK
SLA	LCK
PIK3CD	LCK
IRF8	LCK
GMFG	LCK
FGL2	LCK
IL10RA	LCK
CXorf9	LCK
CSF2RB	LCK
CORO1A	LCK
HEM1	LCK
SELPLG	LCK
EVI2B	LCK
RAC2	LCK
LPXN	LCK
ARHGAP15	LCK
SAMSN1	LCK
KIAA0053	LCK
HLA‐F	MHC‐I
HLA‐B	MHC‐I
HLA‐G	MHC‐I
HLA‐A	MHC‐I
HLA‐C	MHC‐I
HLA‐J	MHC‐I
STAT1	STAT1
GBP1	STAT1
TAP1	STAT1
IRF1	STAT1
CXCL9	STAT1
PSMB9	STAT1
CXCL10	STAT1
INDO	STAT1
CXCL11	STAT1
IFIH1	STAT1
MX1	Interferon
IFI27	Interferon
OAS1	Interferon
IFIT1	Interferon
G1P3	Interferon
IFI44L	Interferon
IFIT3	Interferon
OAS2	Interferon
G1P2	Interferon
RSAD2	Interferon
IFI44	Interferon
OAS3	Interferon
FLJ20035	Interferon
CD274	B7-CD28
CD276	B7-CD28
CTLA4	B7-CD28
HHLA2	B7-CD28
ICOS	B7-CD28
ICOSLG	B7-CD28
PDCD1	B7-CD28
PDCD1LG2	B7-CD28
TMIGD2	B7-CD28
VTCN1	B7-CD28
BTLA	TNF
CD27	TNF
CD40	TNF
CD40LG	TNF
CD70	TNF
TNFRSF18	TNF
TNFRSF4	TNF
TNFRSF9	TNF
TNFSF14	TNF
TNSF4	TNF
TNSF9	TNF
